# Supplementary material for: Biological Membranes in Extreme Conditions: Simulations of Anionic Archaeal Tetraether Lipid Membranes
Source: PubMed Central journal article supplement (PMC4864297; doi:10.1371/journal.pone.0155287), 2016-05-11
Supplement: pone.0155287.s002.pdf [file pone.0155287.s002.pdf]

Appendix for:  
**Biological Membranes in Extreme Conditions: Simulations of Anionic Archaeal Tetraether Lipid Membranes**

Luis Felipe Pineda De Castro<sup>1,2,☐</sup>, Mark Dopson<sup>3</sup>, Ran Friedman<sup>1,2,\*</sup>

**1 Computational Chemistry and Biochemistry research Group (CCBG), Department of Chemistry and Biomedical Sciences, Linnæus University, 391 82 Kalmar, Sweden**

**2 Centre of Excellence “Biomaterials Chemistry”, Linnæus University, 391 82 Kalmar, Sweden**

**3 Systems Biology of Microorganisms Research Group (SBMR), Centre for Ecology and Evolution in Microbial model Systems (EEMiS), Linnæus University, 391 82 Kalmar, Sweden**

☐ Present address, Laboratory of Molecular Modeling, University of Gdansk, ul. Wita Stwosza 63, PL-80-308 Gdansk, Poland

\* ran.friedman@lnu.se

## Appendix - effect of the surface tension parameter on the properties of the membranes

All membrane simulations were carried out using a set-up that mimicked the  $Np\gamma T$  ensemble, i.e., constant number of particles, pressure, temperature and surface tension. The surface tension of di- and tetra-ether membranes was not known from experiment, and an ambient value of 44 mN/m [1] was used in the simulations. To examine the effect of altering the surface tension, simulations of the GDNT.4 system with  $B^+$  counter ions were also performed at reduced (24 mN/m) and increased (64 mN/m) surface tension. The results showed little dependence of membrane properties on the exact value of the surface tension. Deviations between the systems were smaller than 5% in all of the calculated observables (Table 1).

**Table 1. Effect of the surface tension ( $\gamma$ ) on the physical properties of GDNT-4 membranes**

| $\gamma$ (mN/m) | APL ( $\text{\AA}^2$ ) | VPL ( $\text{\AA}^3$ ) | Lz ( $\text{\AA}$ ) | $d_{PP}$ ( $\text{\AA}$ ) | VMU ( $\text{\AA}^3$ ) |
|-----------------|------------------------|------------------------|---------------------|---------------------------|------------------------|
| 24              | 67.8(.1)               | 2933(10)               | 43.3(.2)            | 39.0(.4)                  | 2647(.6)               |
| 44              | 70.9(.1)               | 2947(10)               | 41.6(.2)            | 37.9(.4)                  | 2683(.7)               |
| 64              | 70.6(.2)               | 2947(12)               | 41.7(.3)            | 38.8(.4)                  | 2741(.6)               |

## References

1. Siu SW, Vácha R, Jungwirth P, Böckmann RA. Biomolecular simulations of membranes: physical properties from different force fields. *J Chem Phys.* 2008;128:125103.
